1        **Strengthening health service delivery and governance through institutionalizing ‘Urban**  
2        **Health Atlas’ - a geo-referenced Information Communication and Technology tool: lessons**  
3                **learned from an implementation research in three cities in Bangladesh**

4  
5  
6        Sohana Shafique<sup>1</sup>, Dipika Shankar Bhattacharyya<sup>1</sup>, Md. Tarek Hossain<sup>1</sup>, Shaikh Mehdi Hasan<sup>1</sup>,  
7        Shakil Ahmed<sup>1</sup>, Rubana Islam<sup>2</sup>, Alayne M. Adams<sup>3</sup>

8  
9  
10        <sup>1</sup> Health Systems and Population Studies Division, icddr,b, Dhaka, Bangladesh

11        <sup>2</sup>School of Population Health, University of New South Wales, Sydney, New South Wales,  
12        Australia

13        <sup>3</sup>Department of Family Medicine, Faculty of Medicine and Health Sciences, McGill University,  
14        Montreal, Quebec, Canada

15  
16  
17        **Corresponding author**

18        Email: [sohana.shafique@icddr.org](mailto:sohana.shafique@icddr.org) (SS)

19

## 20 **Abstract**

## 21 **Introduction**

22 Urban health governance in Bangladesh is complex as multiple actors are involved and no  
23 comprehensive data are currently available on infrastructure, services, or performance either in  
24 public and private sectors of the healthcare system. The Urban Health Atlas (UHA) – a novel and  
25 interactive geo-referenced, web-based visualization tool was developed in Bangladesh to provide  
26 geospatial and service information to decision makers involved in urban health service planning  
27 and governance. Our objective was to study the opportunities for institutionalization of the UHA  
28 into government health systems responsible for urban healthcare delivery and document the  
29 facilitators and barriers to its uptake.

30

## 31 **Methods**

32 This mixed-methods implementation research was carried out during 2017-2019 in three cities in  
33 Bangladesh: Dhaka, Dinajpur and Jashore. During the intervention period, six hands-on trainings  
34 on UHA were provided to 67 urban health managers across three study sites. Both in-depth and  
35 key informant interviews were conducted to understand user experience and document  
36 stakeholder perceptions of institutionalizing UHA.

37

## 38 **Results**

39 Capacity building on UHA enhanced understanding of health managers around its utility for  
40 service delivery planning, decision making and oversight. Uptake of UHA was challenged by  
41 inadequate ICT infrastructure, shortage of human resources and general lack of ICT skill among

42 the managers. Motivating key decision makers and stakeholders about the potential of UHA and  
43 engaging them from the inception helped the institutionalization process.

44

## 45 **Conclusion**

46 While uptake of UHA by government health managers appears possible with dedicated capacity  
47 building initiatives, its use and regular update are challenged by multiple factors at the  
48 implementation level. A clear understanding of context, actors and system readiness is  
49 foundational in determining whether the institutionalization of health ICTs is timely, realistic or  
50 relevant.

## 51 **Introduction**

52 By the year 2040, half of the population of Bangladesh will reside in cities with almost one-third  
53 of urban dwellers living in informal settlements [1]. Although the country has made remarkable  
54 progress in reducing maternal and child mortality and achieving global goals [2], there are  
55 significant disparities in maternal neonatal and child health (MNCH)-related indicators and  
56 access to services across socioeconomic strata especially in urban areas [3-5]. Of particular note  
57 are higher rates of childhood stunting and infant mortality in urban informal settlements  
58 compared to other urban areas and the national average [5-7]. Persistent inequities in key health  
59 indicators stem from social determinants of health as well as deficits in health service coverage,  
60 access, and quality, including timely and appropriate primary to tertiary-level referral. These  
61 inequities have widened as a result of unprecedented COVID-19 related disruptions to health  
62 systems and to livelihoods of the urban poor [8-9].

63  
64 The urban health system in Bangladesh is pluralistic and characterized by inadequate  
65 coordination and regulation, and geographic and socioeconomic inequities in healthcare access  
66 [10-13]. Poor planning and management capacity, lack of clear roles and responsibilities among  
67 various health-related authorities, and gaps in service coverage and key human resources are  
68 challenges in ensuring urban health [14]. The formal private sector is massive, accounting for  
69 80% of over 3500 hospitals in Bangladesh, and an even greater percentage in urban areas [14].  
70 Lack of regulation of this sector has resulted in concerns about the quality of care and financial  
71 accessibility, especially for the urban poor [15-16]. Inadequate public primary care infrastructure  
72 and services disproportionately impact the urban poor and pose a significant challenges to the  
73 country's aspirations to meet the goal of Universal Health Coverage by 2030 [17-18].

74  
75 The World Health Organization (WHO) suggests that all member countries have a master facility  
76 list to support health service delivery and monitoring [19]. Enabling the use of data for strategic  
77 decision-making and better governance, institutionalized health management information  
78 systems (HMIS) represent the foundation upon which improvements in health outcomes can be  
79 monitored and greater accountability ensured [20]. In this regard, the Ministry of Health and  
80 Family Welfare (MOHFW) in Bangladesh is implementing the District Health Information  
81 Software-2 (DHIS2) with support from development partners to facilitate evidence-informed  
82 planning and decision making [21]. While the system has been rolled out nationally, information  
83 is largely confined to public healthcare facilities. In urban areas, except for large public hospitals  
84 and some NGOs involved in primary care provision, data are particularly sparse, especially for  
85 the large private sector.

86  
87 To address this information gap, a geo-referenced health facility database for nine major cities  
88 and municipalities across Bangladesh [22] was assembled. To make the data more accessible and  
89 useful to non-technical policy makers and public health managers [23], an Information  
90 Communication and Technology (ICT) tool called Urban Health Atlas (UHA) was developed  
91 (<http://urbanhealthatlas.com>). This Geographic Information System (GIS) based interactive  
92 online tool displays health facility data visually and permits their manipulation for better  
93 healthcare planning and decision making. Providing detailed information on the location and  
94 services available at public and private health facilities, it allows users to examine gaps and  
95 duplication in service provision, assess the coverage of emergency services and the availability  
96 of doctors in 24 hours, visualize population coverage and poverty mapping, calculate the shortest

97 distance to referral facilities from any location, and determine whether a given facility is licensed  
98 and registered.

99

100 In the present context of urban health in Bangladesh, UHA could serve as an important tool to  
101 support health planning processes. The study aims to document stakeholder perceptions and  
102 experiences in adopting this tool to assist in strategic healthcare planning, day-to-day decision-  
103 making and oversight, with the goal of increasing equity and efficiency in urban MNCH  
104 services.

105

## 106 **Methods**

### 107 **Study design and participants**

108 This implementation research [IR] was conducted between 2016 and 2019 and employs a mixed-  
109 methods approach [24]. Detailed methods have been reported elsewhere [25]. Briefly, the WHO  
110 PATH toolkit was used to guide the introduction and implementation of information and  
111 communications technology (ICT) in health information systems [26].

112

### 113 **Study sites**

114 Two city corporations (CCs) – Dhaka North City Corporation (DNCC) and Dhaka South City  
115 Corporation (DSCC) – and two municipalities, Jashore and Dinajpur in northern and south  
116 divisions were purposively selected, both of which have geo-referenced health facility data  
117 collected by icddr,b.

## 118 **Sample size**

119 Through a stakeholder mapping exercise, national and local level urban health decision makers  
120 were engaged to help identify potential users for UHA, yielding a sample of 15-16 respondents  
121 for each of 4 study sites. The sampling strategy, type, and number of respondents in each site are  
122 published elsewhere [25].

123

## 124 **Implementation process**

125 The study implementation process began with stakeholder sensitization and partnership-building  
126 through two consultation workshops. These workshops served to generate suggestions on how to  
127 promote uptake, regular use, and update of UHA, create buy-in for the implementation research  
128 project, and promote stakeholder engagement in UHA advocacy. As a result of this process, an  
129 implementation partnership with the Management Information System (MIS) of the Directorate  
130 General of Health Services (DGHS), MOHFW was formalized through a Memorandum of  
131 Understanding (MoU) between icddr,b and DGHS. Permission letters were also obtained from  
132 mayors of CCs and municipalities.

133

134 The UHA training intervention consisted of capacity building sessions for government and other  
135 urban health planners and managers on how to employ UHA as a planning tool to integrate and  
136 expand maternal, newborn, and reproductive health services with a focus on improving access  
137 for the urban poor. Trainees were selected in consultation with local government authorities. The  
138 total number of participants enrolled in capacity-building training by city is shared in Table 1.  
139 All institutional agreements and permissions were sought in advance from local government  
140 institutions and the health ministry.

141

142 **Table 1. Total number of participants in the capacity building workshops in Dhaka,**

143 **Dinajpur and Jashore**

| Actors                          | Type of Participants                                                                                         | Number of Participants |          |         |       |
|---------------------------------|--------------------------------------------------------------------------------------------------------------|------------------------|----------|---------|-------|
|                                 |                                                                                                              | Dhaka                  | Dinajpur | Jashore | Total |
| DGHS & Civil Surgeon's office   | Civil Surgeon, Deputy Civil Surgeon, Health Education Officer, Medical Officer, Statistician, Superintendent | 7                      | 7        | 9       | 23    |
| City Corporation & Municipality | Chief Executive Officer, Medical Officer, Sanitary Inspector, EPI Supervisor                                 | 2                      | 4        | 3       | 9     |
| DGFP & DDFP                     | Deputy Directors- Family Planning, Upazila Family Planning Officer, Statistician                             | 2                      | 4        | 7       | 13    |
| DGDA                            | Drug Superintendents                                                                                         | 2                      | 1        | -       | 3     |
| NGOs                            | Clinic Managers, Project Managers                                                                            | 4                      | 5        | 5       | 14    |
| Private sector                  | Private Clinic Owners' Association                                                                           | -                      | 1        | 1       | 2     |
| Academia                        | Professor & Academicians                                                                                     | 2                      | 1        | -       | 3     |



**Total** **19** **23** **25** **67**

---

144 DGHS, Directorate General of Health Services; DGFP, Directorate General of Family Planning; DDFP, Deputy  
145 Director of Family Planning; DGDA, Directorate General of Drug Administration; EPI, Expanded Programme of  
146 Immunization.  
147  
148 Capacity building was divided into two phases: In the first phase, a two-day training was  
149 provided to participants that involved a series of hands-on exercises; and in the second phase, a  
150 refresher training was conducted three months post basic training among the same participants. A  
151 training manual was prepared to guide UHA capacity-building workshops including case studies,  
152 guidelines for group work and hands-on activities, pre-test/post-test questionnaires, etc. The  
153 training was organized with key actors in the urban healthcare system including health workers  
154 and managers working in local government, and NGOs. Training modalities were contextualized  
155 based on local needs in discussion with implementation partners, and facilitated by experts in  
156 urban health, and health management and geographic information systems (HMIS and GIS).  
157 Training sessions provided an introduction to current urban health challenges in each city,  
158 followed by an overview and demonstration of the UHA and its functions. Hands-on training,  
159 group work, and case studies were undertaken to familiarize users with UHA and to get their  
160 feedback on how it could be improved to better meet their needs, and suggestions on how health  
161 services information could be updated.

162

## 163 **Data collection**

164 Methods used for data collection included desk review and a series of in-depth interviews  
165 conducted by an experienced group of researchers with expertise in qualitative and mixed-

166 methods approaches. The desk review involved the critical assessment of existing policies  
167 related to urban health and the use of ICTs in for primary care and MNCH decision making,  
168 including the: i) 2011 National Health Policy; ii) The 2009 National ICT policy; iii) 2014  
169 National Urban Health Strategy; iv) Program Implementation Plan of MOHFW. Interviews were  
170 conducted with stakeholders and trainees prior to, during and post the UHA intervention  
171 employing the steps for ICT institutionalization outlined in the WHO PATH toolkit. Key  
172 informant interviews (KIIs) with urban health system actors and policymakers along with desk  
173 reviews were undertaken to document how MNCH planning and referral decisions are currently  
174 made. In-depth interviews (IDIs) with potential UHA users were conducted to explore user  
175 preferences and information needs to refine the UHA tool in advance of the training. A  
176 subsequent set of IDIs with UHA users sought to understand their experiences and to document  
177 challenges and successes of using UHA for MNCH service decision-making during training and  
178 one- & three-months post-training. Alongside interviews, process documentation of the  
179 dynamics of UHA uptake was undertaken, which considered contextual factors and their  
180 influence. All interviews were recorded with participant consent, but with simultaneous note-  
181 taking in case of equipment failure.

182

## 183 **Data analysis**

184 Data transcription occurred immediately following each interview, followed by translation into  
185 English. Data familiarization involved reading the transcripts repeatedly to appreciate data  
186 content, structure, and emerging themes. Initial analyses involved developing a process  
187 flowchart for current decision-making practices using the KII results and organizational process  
188 reviews. In addition, a list of user needs was extracted that helped identify the most important

189 and feasible functions to be added to UHA. Analysis of UHA user interviews involved applying  
190 “a priori” codes derived from the WHO PATH toolkit [WHO/PATH], and exploring patterns and  
191 themes using the Framework Method [27].

192 Transcripts were coded using ATLAS-ti (version-7.5.7). A team approach to analysis was  
193 employed to minimize individual biases and periodic inter-coder reliability checks were  
194 organized. Group discussions of emerging themes and patterns in the data were oriented around  
195 data displays that allowed for more systematic pattern-testing and cross-checking across  
196 respondents.

197

## 198 **Ethics**

199 The study protocol was approved the Research Review Committee (RRC) and the Ethical  
200 Review Committee (ERC) of icddr,b, both of which provided a thorough and critical review of  
201 its technical and ethical aspects. Participants were asked for written consent before interviewing  
202 and were kept anonymous and unidentifiable. All data were kept in locked storage, or controlled  
203 access folders, allowing only investigators of the study and members of the ERC of icddr,b to  
204 access information, if needed.

205

## 206 **Results**

207 Three key themes related to the ‘Uptake’, ‘Use’ and ‘Update’ of the UHA were identified.  
208 Within the area of ICT use, the concepts of *understandability*, *usability*, and *utility* were also  
209 explored. *Understandability of UHA* refers to the extent to which the tool’s features are  
210 understood by users *Usability* denotes the extent to which the tool and its features are easy to use

211 and apply, while *utility* captures the tool’s perceived practical application by users. Each of these  
212 themes are discussed here, with a focus on factors facilitating or challenging the  
213 institutionalizing process of UHA at both individual and organizational levels (**Fig 1**).

214

215 **[Fig 1. Original conceptual framework for institutionalization developed by authors**  
216 **before implementation]**

217

## 218 **Factors influencing ‘uptake’ of UHA**

219 As regards uptake of the tool, our findings indicated the importance of policy level support, and  
220 stakeholder involvement as crucial facilitators along with efforts to understand and respond to  
221 user needs and responsibilities. A major challenge was the degree of individual, organizational  
222 and system readiness for a digital tool and its application in the absence of formal systems of  
223 urban health service planning.

224

### 225 **Policy-level support for ICT and evidence-informed planning and decision making**

226 Bangladesh has made remarkable progress in terms of incorporating ICT-based innovation into  
227 the health system with policy support [21]. The country is now one of the largest implementers  
228 of the Demographic Health System 2 (DHIS2) globally, with an average reporting rate of 98%  
229 [28]. A number of other digital platforms and software for collecting, analyzing, and getting  
230 feedback on routine health-related data are also in place [29]. From the policy review, it was  
231 found that the Health Ministry’s (MOHFW) commitment to improving health outcomes and  
232 producing and digitizing real-time health data are factors supportive of ICT innovation and  
233 uptake in rural health systems including tertiary-level hospitals. However, within urban areas  
234 where responsibility for primary care services falls with the Ministry of Local Government,

235 Rural Development and Co-operatives (MOLGRD&C), investments in digitized platforms and  
236 processes, including regular capacity strengthening programmes for managers around routine  
237 HMIS, have been less apparent. Thus, while policy appetite for ICT exists at the national level,  
238 this has not been translated into ICT uptake at the local government level especially in the  
239 context of urban service provision.

240

#### 241 **Involving stakeholders from the beginning**

242 Rapport building with key stakeholders in the early stages of the project and the development of  
243 formalized institutional agreements, were fundamental to the implementation process. A letter of  
244 support was issued by the Director, MIS, DGHS under the MOHFW ensuring their commitment  
245 to facilitate project implementation as appropriate, while MoU's and permission letters from  
246 local level authorities helped mitigate bureaucratic challenges. These efforts helped ensure the  
247 cooperation of health workers and managers within local government institutions and the DGHS,  
248 and facilitated project roll-out from design to implementation.

249

250 To further cultivate stakeholder interest in shaping the implementation of UHA within the  
251 government system, a Technical Advisory Group (TAG) was formed consisting of urban health  
252 actors including Government, development partners, NGOs, academicians and public health and  
253 e-Health experts. The Director General, DGHS assumed the role of Chair. TAG members were  
254 purposively selected with the goal of creating well-placed advocates for UHA and its uptake for  
255 urban health decision making, planning, referral and regulation at the policy level. Three TAG  
256 meetings were organized throughout the study period. In addition, two stakeholder consultation  
257 workshops were arranged to explore their interests, roles, information needs and perceptions on

258 how UHA might benefit their respective institutions. Useful suggestions were generated on  
259 potential institutionalization processes for UHA, and how to make the UHA user-friendly for  
260 health managers. For example, the filter searching options in UHA were simplified and a Bangla  
261 interface was added based on suggestions received by senior government officials.

262

### 263 **Assessing system readiness for institutionalizing UHA or any ICT tool**

264 System readiness greatly influenced uptake of UHA like any other ICT tool. At the institutional  
265 level, lack of available infrastructure and training, and bureaucratic barriers to obtaining both,  
266 were the major challenges regarding the uptake of UHA. Infrastructural capacity constraints  
267 were widespread within local government and the district office of the Ministry of Health,  
268 including inadequate internet supply, ICT equipment and human resources. Local-level managers  
269 also reported bureaucratic delays in procuring and repairing equipment, and renewing software  
270 licensing, as well as a lack of needs-based ICT training.

271

272 Beyond institutional level challenges, individual barriers to adopting ICT tools were noted. For  
273 example, one informant from the DGHS, MOHFW commented that even after issuing  
274 government orders for ICT uptake from the central management level, it took a long time for  
275 people to become comfortable with new ICT tools. There was also resistance against replacing  
276 familiar systems with unfamiliar technology. In his opinion:

277

278 *“In any organization, resistance (to adopt a new ICT tool) is high... many senior staff are*  
279 *reluctant to use it as they have been using the manual system for years and years.*

280 *Therefore, reluctance to change in the system might be a barrier (for institutionalizing*  
281 *UHA).” (KII 1, DGHS, Dhaka)*

282

### 283 **Tailoring UHA to enable the regular assigned tasks of potential users**

284 We documented the tasks and processes managers need to accomplish their job responsibilities  
285 and how UHA might assist in performing these tasks more efficiently. One NGO programme  
286 manager mentioned that knowing about the distribution of facilities and their service details  
287 across the urban areas was helpful carrying out their duties, while a government official noted:

288

289 *“We do not have well-organized data on private sector facilities. As a result, we missed*  
290 *some information, especially in terms of institutional delivery and MNCH services*  
291 *provided by private sector... if we can make a unified system to report who provided the*  
292 *service and how they provided this, it will be helpful in executing our job. The UHA can*  
293 *help the coordination process.” (IDI 3, government official, Jashore)*

294

### 295 **Prior experience with data-driven planning and decision making**

296 Implementation of various ICT based tools in the health sector (e.g. DHIS2, HRIS, OpenMRS,  
297 Tableau etc.) have facilitated data-driven decision making. It is not surprising, therefore, that  
298 prior experience with government ICT systems was beneficial in understanding the potential of  
299 UHA and influenced levels of comfort with the tool. It should be noted, however, that exposure  
300 to and comfort with ICTs varied substantially by age, and that internet literacy also varied by  
301 cadre among government officials and managers.

302

### 303 **Perceived utility by potential users**

304 The most commonly perceived application of UHA was in enabling planning-related tasks and  
305 performance given its comprehensive geo-coded database of health facilities. Apart from this  
306 organizational advantage, study participants noted individual benefits. These related to its  
307 potential personal use in helping search for a specialist or the nearest facility during an  
308 emergency situation. Many suggested that the existing web-based version of the UHA tool might  
309 be adapted as a mobile application to enable offline access to data and greater convenience.

310

### 311 **Capacity building on UHA & modification of the tool**

312 Hands-on capacity building workshops and refresher trainings were appreciated by participants  
313 and served to identify and resolve practical issues affecting the usability and understandability of  
314 UHA. One such issue was the slow loading time of the tool, which was subsequently reduced by  
315 by separating out drug shops from health facilities (e.g. hospital, clinic, NGOs etc.) in the search  
316 function. The continuous refinement of the tool and tailored modifications in response to user  
317 needs and demands are important facilitating factors for institutionalizing any ICT.

318

### 319 **Factors influencing ‘use’ of UHA**

320 We investigated the use of UHA under three major sub-themes: *Understandability*, *Usability*,  
321 and *Utility*. Factors facilitating or challenging the understandability of UHA among users in the  
322 study were training, compatibility with work, and previous exposure to ICT tools or e-health  
323 technologies. Participation in organized hands-on training was the most cited reason for  
324 improved understanding of the tool. For users who had previous exposure to ICT and had  
325 worked with similar ICT tools, the UHA was easily understood and its design and features were



326 well-recognized. The categorization of data in UHA by type of facility, defined area location,  
327 price list and opening hours helped to make the UHA interesting to participants and facilitated  
328 understandability of its various functions.

329

330 Efforts to increase usability through a Bangla translated version of the tool, new filter options,  
331 and training around these features were especially appreciated. As one NGO manager said:

332

333 *“Through the training on UHA, we got to know where we need to click to find the kind of*  
334 *data we need and made it useful for us...the whole urban health scene of Dinajpur (is) in*  
335 *one place - hat my organization is doing, what the government is doing, what other*  
336 *health facilities are doing...” (IDI 5, NGO Personnel, Dinajpur)*

337

338 The utility of the tool was mainly perceived in the area of planning, decision making and  
339 oversight by managers, especially in terms of redistributing MNCH facilities more equitably by  
340 geography and population needs. According to the district health manager of one municipality:

341

342 *“The information provided in UHA: the location, the ward boundaries, and the*  
343 *corresponding number of facilities will help urban health planning purposes. For*  
344 *example, now I can see that certain wards contain many facilities, whereas other wards*  
345 *have few. So I can redistribute them, and plan and implement in a more (evidence-based)*  
346 *way. If implementation occurs, I can use these maps to distribute and supervise my*  
347 *workers and decide where I need more support. It will also help me in evaluation to*

348            *understand what things were supposed to be done what needs to be improved.” (IDI 1,*  
349            *Government Official, Dinajpur)*

350

351 Study participants opined that one of the strengths of UHA is its complete database of healthcare  
352 facilities, including their geo-location and related service details. As such, participants thought it  
353 was a unique resource with many possible applications with respect to MNCH planning in  
354 complex urban settings. In fact, these applications were used by health planners to improve the  
355 distribution of MNCH health services in Dinajpur [30] by identifying and reducing duplication  
356 and service gaps among satellite centers and Extended Program on Immunization (EPI) sites  
357 and ensuring that designated service providers were accountable for delivering services in  
358 designated wards. The tool was also used for service re-allocation and emergency health service  
359 management in Dinajpur [30]. Using ward-wise population data available in UHA, decisions  
360 were made regarding emergency needs for Oral Rehydration Solution (ORS), zinc tablets and  
361 other drugs:

362

363            *“During the last flood in Dinajpur, I estimated the ward-wise population from this tool.*  
364            *This helped me to estimate how many zinc tablets and other emergency drugs needed to*  
365            *be distributed (per ward). When I will present the data of my city during this year's flood,*  
366            *I can demonstrate it using UHA.” (IDI-6, Dinajpur)*

367

368 As patients and service seekers themselves, study participants also recognized the tool’s worth  
369 from the demand side, and its potential in helping access appropriate and proximate care while  
370 minimizing the involvement of middlemen.

371

## 372 **Factors facilitating regular ‘update’ of UHA**

373 Lack of an agreed mechanism to update and link urban facility data to routine HMIS data, was  
374 perceived as an impediment to regular use of UHA for planning purposes. Weak administrative  
375 and planning capacity at local level and a limited urban mandate at the national level accounted  
376 for this absence. As one study participant explained:

377 *“It is a useful tool but there is a lot of scope for improvement. The most important one is*  
378 *regular updating of facility and service data. There should be proper mechanisms and*  
379 *guidelines on how, when, and who should update it.” (IDI 3, government official,*  
380 *Jashore)*

381

382 High turnover of those in key decision-making positions was perceived to further hinder or delay  
383 UHA update or institutionalization. Shifting priorities, lack of interest and commitment, and  
384 differences of opinion on how and who should take charge of update, were widespread. For  
385 example, in Dinajpur, stakeholders stated that the Civil Surgeon’s office should be responsible  
386 for updating UHA information since all health-related reports are the responsibility of the Civil  
387 Surgeon’s Office. On the other hand, in Jashore, stakeholders opined that municipal authorities  
388 should lead the process of regular update given that urban primary health care falls under the  
389 jurisdiction of urban local body of MOLGRD&C. In both cases, however, there was a common  
390 understanding that a separate unit was needed to ensure accountability and coordination among  
391 those collecting, providing and using the information available in UHA. Regular capacity  
392 building would also be needed.

393

394 The conceptual framework was revised considering the findings of the study (Fig 2).

395

396 **[Fig 2. Revised conceptual framework for institutionalization of Urban Health Atlas]**

397

## 398 **Discussion**

399 This mixed-method implementation research is among the first studies in Bangladesh to explore

400 processes for institutionalizing geo-referenced ICTs to strengthen health service planning,

401 referral, and oversight in urban areas. Study findings demonstrate the utility of geo-referenced

402 health facility information for MNCH service planning and decision making in urban settings

403 and the value of data visualization as a means of enabling data use by non-technical persons.

404 Findings also emphasize the necessity of capacity strengthening around ICT use to support

405 evidence-based decision making. Despite the potential of UHA for urban health planning, many

406 factors hindering ICT uptake, use and update were identified which undermine the goal of

407 institutionalization. At the same time, the value of integrating and scaling up urban health facility

408 information into the national health systems was recognized, as well as key implementation

409 strategies.

410

411 Study results reinforced the importance of engaging stakeholders at the project conceptualization

412 phase to facilitate implementation and ensure that ICT products are relevant and feasible. Bryson

413 et al [31] similarly emphasized early stakeholder engagement as crucial to the development of

414 ICT tools that are technically feasible and politically acceptable, while Makinde *et al.*, [32]

415 attributed ICT adoption to the involvement of multilevel stakeholders, from users to

416 policymakers. In the context of Bangladesh, an engaged, multi-stakeholder approach was

417 particularly crucial given the complexity of urban health service delivery involving multiple state  
418 and non-state authorities and actors at implementation and policy-making levels [33]. Indeed,  
419 given the pluralistic nature of many urban health systems in LMICs, multi-sector, multi-level  
420 engagement around ICT uptake and service delivery planning is essential in efforts to increase  
421 equitable access to healthcare [18, 34].

422  
423 Consistent with our results, Mengiste et al. [35] identified lack of infrastructure as a key factor  
424 limiting system readiness for the adoption of ICT tools in the health sector in LMIC settings.  
425 This is supported by a study of DHIS2 deployment in Bangladesh, which noted poor internet  
426 connectivity and irregular electricity as hindering implementation [36]. These issues of  
427 infrastructural barrier are accompanied by resistance to change at individual and/or  
428 organizational level which is typical of many government bureaucracies in LMICs [37].

429  
430 In terms of individual-level factors influencing uptake of ICT, our study identified the perceived  
431 utility of the tool, and the user's job description, and professional capacity as especially  
432 important. This finding is congruent with a systematic review conducted by Gagnon et al. [38]  
433 that highlighted perceived ICT usefulness, familiarity and appropriate training of end users as the  
434 main factors influencing adoption. To this point, our results indicated the importance of  
435 understanding job-related needs and preferences of potential users prior to ICT implementation.  
436 Modifications to the tool such as introducing the Bangla interface and adapting filtering options  
437 to better reflect user needs, improved its acceptability and facilitated both policy buy-in and  
438 uptake and use of UHA. These observations are consistent with a literature suggesting that  
439 adoption of eHealth innovations is unlikely if the existing skills and capacities of target users are

440 insufficient [38-39]. One scoping review examining factors enabling ICT uptake and scale,  
441 emphasized the importance of technical training, demonstrating the value of the innovation, and  
442 customizing the technology in terms of local language and user culture and comfort, including  
443 interface appearance [40]. Likewise, in Tanzania, it was found that the introduction of a tool  
444 intended to improve the delivery of health care services was only possible when there was a  
445 perceived need for the tool and prerequisite ICT training [41].

446  
447 When examining the adoption or ‘use’ of our ICT tool we considered three dimensions -  
448 Understandability, Usability, and Utility – each of which influenced the extent to which it might  
449 be employed by users and the institutions in which they work. Successful use of ICT requires  
450 understanding, or more specifically digital literacy. In South Asia, the lack of well-trained ICT  
451 personnel was found as a barrier to the adoption of health technology [42]. Contrariwise, in  
452 Ghana, internet literacy improved confidence in using ICT tools in service delivery [43].

453  
454 The usability of ICT is also critical. A systematic review in low-and middle-income countries  
455 (LMICs) identified that faulty, fragmented, and limited functionality of electronic health systems  
456 and software developed in languages other than English, were the main technical barriers to  
457 adopting ICT tools in LMICs [44]. In terms of utility, ICT systems that are not a good fit with  
458 work practices or regular activities are reported as barriers for successful implementation [38].  
459 While health workers in Uganda perceived ICTs as beneficial for job performance; limited  
460 knowledge and skills, poor internet networks, and inadequate logistics supply were the reported  
461 barriers to use [45]. Likewise, participants in our study considered UHA as beneficial and

462 relevant to their daily assigned tasks, yet, lack of infrastructure, logistic support and system  
463 readiness hampered routine implementation.

464  
465 Despite these challenges, the use of ICT tools for health systems planning has grown  
466 exponentially [29, 46-47]. Participants in our study perceived many potential applications of  
467 UHC in health service planning, decision making, as well as facility and emergency management  
468 and its benefits in terms of efficiency and accountability. For example, the adoption of UHA in  
469 Dinajpur district as a tool for planning, assisted in decisions about the location of NGO services  
470 to improve service coverage.

471  
472 Regardless of setting, a key requirement of institutionalizing ICT is maintenance of quality, up-  
473 to-date data. In implementing a health workforce planning tool in the USA, collaboration  
474 between state agencies, stakeholders and relationships among data contributors and data stewards  
475 were needed to keep the application current [46]. In the context of UHA, participants emphasized  
476 that institutionalization was contingent on keeping health services data up-to-date and identifying  
477 a responsible authority for this purpose.

478

## 479 **Limitations**

480 The study took place in two city corporations and two municipalities in Bangladesh where UHA  
481 had been implemented. Given the extraordinary diversity of urban settings, generalizability may  
482 be limited. It is possible that in cities with different geo-political administration arrangements,  
483 such as federal and state level divisions in governance, different challenges may be faced.

484 Notwithstanding these differences, insights arising from this study enrich the literature on  
485 conditions, features and processes of successful ICT institutionalization.

486

## 487 **Conclusions**

488 Institutionalization processes for health-related ICTs are influenced by multiple national, local  
489 and individual level factors which must be considered in planning for a successful and  
490 sustainable result. To enable uptake of UHA or any ICT into the government system, efforts to  
491 facilitate use of evidence in decision-making are prerequisite. These include developing  
492 necessary capacity and infrastructure and identifying or defining jobs that enable their useful  
493 application. A clear understanding of context, actors and system readiness is foundational in  
494 determining whether the institutionalization of health ICTs is timely, realistic or relevant. When  
495 institutionalized successfully, ICTs such as the UHA have the potential to strengthen government  
496 HMIS, enable governance and accountability and ultimately, help achieve Universal Health  
497 Coverage and sustainable development. In the context of this study, necessary next priorities for  
498 research is identifying feasible methods to keep the UHA up-to-date with the collaboration of the  
499 Ministry of Health and municipal services.

500



## 501 **List of Abbreviations**

|     |         |                                                                  |
|-----|---------|------------------------------------------------------------------|
| 502 | ADB     | Asian Development Bank                                           |
| 503 | CCs     | City Corporations                                                |
| 504 | DDFP    | Deputy Director of Family Planning                               |
| 505 | DGFP    | Directorate General of Health Services                           |
| 506 | DGHS    | Directorate General of Health Services                           |
| 507 | EPI     | Expanded Program on Immunization                                 |
| 508 | ERC     | Ethical Review Committee                                         |
| 509 | GIS     | Geographic Information System                                    |
| 510 | HMIS    | Health Management Information System                             |
| 511 | ICT     | Information Communication and Technology                         |
| 512 | IDI     | In-depth Interviews                                              |
| 513 | KII     | Key Informant Interviews                                         |
| 514 | LMICs   | Low and Middle Income Countries                                  |
| 515 | MNCH    | Maternal, newborn and child health                               |
| 516 | MOHFW   | Ministry of Health and Family Welfare                            |
| 517 | MOLGRDC | Ministry of Local Government, Rural Development and Cooperatives |
| 518 | NGOs    | Non-Government Organizations                                     |
| 519 | PHC     | Primary Health Care                                              |
| 520 | RRC     | Research Review Committee                                        |
| 521 | SDGs    | Sustainable Development Goals                                    |
| 522 | UHA     | Urban Health Atlas                                               |
| 523 | UHC     | Universal Health Coverage                                        |

524 WHO World Health Organization

## 525 **References**

526

527 1. United Nations. Department of economic and social Affairs population dynamics. World  
528 Urbanization Prospects. 2018.

529 2. Chowdhury AM, Bhuiya A, Chowdhury ME, Rasheed S, Hussain Z, Chen LC. The  
530 Bangladesh paradox: exceptional health achievement despite economic poverty. The  
531 Lancet. 2013 Nov 23;382(9906):1734-45.

532 3. National Institute of Population Research and Training (NIPORT)., Mitra and  
533 Associates., ICF International. Bangladesh Demographic and Health Survey 2014.  
534 Dhaka, Bangladesh and Calverton, Maryland, USA: NIPORT, Mitra and Associates, and  
535 ICF International; 2015.

536 4. National Institute of Population Research and Training (NIPORT), and ICF. 2020.  
537 Bangladesh Demographic and Health Survey 2017–18. Dhaka, Bangladesh, and  
538 Rockville, Maryland, USA: NIPORT and ICF.

539 5. Bangladesh Bureau of Statistics. Progotir Pathay Bangladesh. Multiple Indicator Cluster  
540 Survey 2019, Key Findings. Dhaka, Bangladesh. 2019.

541 6. National Institute of Population Research and Training (NIPORT). International Centre  
542 for Diarrhoeal Disease Research, Bangladesh (icddr,b), Measure Evaluation, 2015.  
543 Bangladesh Urban Health Survey 2013 Final Report. Dhaka, Bangladesh, and Chapel  
544 Hill, North Carolina (USA): NIPORT, icddr,b and Measure Evaluation.

545 7. Bangladesh Bureau of Statistics & UNICEF Bangladesh. Child Well-Being Survey 2016,  
546 Final Report. Dhaka, Bangladesh. 2016.

- 547 8. Mottaleb KA, Mainuddin M, Sonobe T. COVID-19 induced economic loss and ensuring  
548 food security for vulnerable groups: Policy implications from Bangladesh. PloS one.  
549 2020 Oct 16;15(10):e0240709.
- 550 9. Anwar S, Nasrullah M, Hosen MJ. COVID-19 and Bangladesh: challenges and how to  
551 address them. *Frontiers in public health*. 2020 Apr 30;8:154.
- 552 10. Alam SMN. Health service delivery: the state of governmentnon-government relations in  
553 Bangladesh. *Public Admin. Dev.*2011;31:273–81.
- 554 11. Afsana K, Wahid SS. Health care for poor people in the urban slums of Bangladesh.  
555 *Lancet* 2013;382:2049–51.
- 556 12. Huque R, Barkat A, Sabina N. Public health expenditure: equity, efficacy and universal  
557 health coverage. *Bangladesh Health Watch Report 2011*. 2011:25.
- 558 13. Hamid SA, Begum A. Responsiveness of the urban primary health care delivery system  
559 in Bangladesh: A comparative analysis. *The International Journal of Health Planning and*  
560 *Management*. 2019 Jan;34(1):251-62.
- 561 14. Ahmed SM, Islam FK, Bhuiya A, ed. *Bangladesh Health Watch Report 2014: Urban*  
562 *Health Scenario: Looking Beyond 2015*. Dhaka: James P Grant School of Public Health,  
563 BRAC University, 2015.
- 564 15. Osman FA. Public health, urban governance and the poor in Bangladesh: policy and  
565 practice. *Asia Pac Dev J*. 2009 Jun;16:27-58.
- 566 16. Matthews Z, Channon A, Neal S, Osrin D, Madise N, Stones W. Examining the “urban  
567 advantage” in maternal health care in developing countries. *PLoS medicine*. 2010 Sep  
568 14;7(9):e1000327.

- 569 17. Adams AM, Ahmed SM, Evans TG. Universal health care in Bangladesh—promises and  
570 perils. *The Lancet Global Health*. 2018 Jan 1;6(1):e10-1
- 571 18. Shafique S, Bhattacharyya DS, Anwar I, Adams A. Right to health and social justice in  
572 Bangladesh: ethical dilemmas and obligations of state and non-state actors to ensure  
573 health for urban poor. *BMC medical ethics*. 2018 Jun;19(1):46
- 574 19. World Health Organization. Master facility list resource package: guidance for countries  
575 wanting to strengthen their master facility list. Available at:  
576 <https://apps.who.int/iris/handle/10665/329492>
- 577 20. Nutley T, Reynolds H. Improving the use of health data for health system strengthening.  
578 *Global health action*. 2013 Dec 1;6(1):20001.
- 579 21. UNICEF. Health system strengthening: Transforming the health information system in  
580 Bangladesh through the implementation of DHIS2 UNICEF; 2019 Available from:  
581 [https://www.unicef.org/rosa/media/3416/file/A%20Case%20Study%20Bangladesh%20O](https://www.unicef.org/rosa/media/3416/file/A%20Case%20Study%20Bangladesh%20Online.pdf)  
582 [nline.pdf](https://www.unicef.org/rosa/media/3416/file/A%20Case%20Study%20Bangladesh%20Online.pdf)
- 583 22. Adams AM, Ahmed S., Hasan SM, et al. Mapping the Urban Healthcare Landscape in 5  
584 City Corporations, Bangladesh. Dhaka: icddr,b, 2015.
- 585 23. Rodríguez DC, Shearer J, Mariano AR, Juma PA, Dalglish SL, Bennett S. Evidence-  
586 informed policymaking in practice: country-level examples of use of evidence for iCCM  
587 policy. *Health Policy and Planning*. 2015 Dec 1;30(suppl\_2):ii36-45.
- 588 24. Peters DH, Adam T, Alonge O, Agyepong IA, Tran N. Implementation research: what it  
589 is and how to do it. *Bmj*. 2013 Nov 20;347.

- 590 25. Islam R, Adams AM, Hasan SM, Ahmed R, Bhattacharyya DS, Shafique S. Making  
591 information and communications technologies (ICTs) work for health: protocol for a  
592 mixed-methods study exploring processes for institutionalising geo-referenced health  
593 information systems to strengthen maternal neonatal and child health (MNCH) service  
594 planning, referral and oversight in urban Bangladesh. *BMJ open*. 2020 Dec  
595 1;10(12):e032820.
- 596 26. World Health Organization/PATH. *Planning an Information Systems Project: A Toolkit*  
597 *for Public Health Managers*. Seattle: PATH, 2013.
- 598 27. Gale NK, Heath G, Cameron E, Rashid S, Redwood S. Using the framework method for  
599 the analysis of qualitative data in multi-disciplinary health research. *BMC medical*  
600 *research methodology*. 2013 Dec;13(1):1-8.
- 601 28. Khan MA, Azad AK, de Oliveira Cruz V. Bangladesh's digital health journey: reflections  
602 on a decade of quiet revolution. *WHO South-East Asia Journal of Public Health*.  
603 2019;8(2):71-6.
- 604 29. Kabir MH, Kibria M. *HIS Mapping: An Inventory of Digital Tools in Use by the*  
605 *Ministry of Health and Family Welfare in Bangladesh*. 2021. Available at:  
606 [https://www.data4impactproject.org/wp-content/uploads/2021/08/HIS-Mapping-in-](https://www.data4impactproject.org/wp-content/uploads/2021/08/HIS-Mapping-in-Bangladesh_fs-21-525_FINAL.pdf)  
607 [Bangladesh\\_fs-21-525\\_FINAL.pdf](https://www.data4impactproject.org/wp-content/uploads/2021/08/HIS-Mapping-in-Bangladesh_fs-21-525_FINAL.pdf)
- 608 30. Hasan SM, Borces KG, Bhattacharyya DS, Ahmed S, Ali A, Adams A. *Healthcare*  
609 *Systems Strengthening in Smaller Cities in Bangladesh: Geospatial Insights From the*  
610 *Municipality of Dinajpur*. *Health Services Insights*. 2020 Sep;13:1178632920951586.

- 611 31. Bryson JM. What to do when stakeholders matter: stakeholder identification and analysis  
612 techniques. *Public management review*. 2004 Mar 1;6(1):21-53.
- 613 32. Makinde OA, Azeez A, Bamidele S, Oyemakinde A, Oyediran KA, Adebayo W,  
614 Fapohunda B, Abioye A, Mullen S. Development of a master health facility list in  
615 Nigeria. *Online journal of public health informatics*. 2014;6(2).
- 616 33. Adams AM, Islam R, Ahmed T. Who serves the urban poor? A geospatial and descriptive  
617 analysis of health services in slum settlements in Dhaka, Bangladesh. *Health policy and  
618 planning*. 2015 Mar 1;30(suppl\_1):i32-45.
- 619 34. Bhattacharyya DS, Dutta GK, Nowrin I, Shafique S, Islam M, Islam R, Anwar I.  
620 Implementing a digital human resources management tool in the government health  
621 sector in Bangladesh: a policy content analysis. *BMC health services research*. 2021  
622 Dec;21(1):1-0.
- 623 35. Mengiste SA. Analysing the Challenges of IS implementation in public health institutions  
624 of a developing country: the need for flexible strategies. *Journal of health informatics in  
625 developing Countries*. 2010 Mar 25;4(1).
- 626 36. Begum T, Khan SM, Ferdous J, Parvez MM, Rahman A, Kumkum FA, Anwa I. Using  
627 DHIS 2 software to collect health data in Bangladesh. Chapel Hill: MEASURE  
628 Evaluation. 2019. Available at  
629 <https://www.measureevaluation.org/resources/publications/wp-19-226>

- 630 37. Khan SZ, Shahid Z, Hedstrom K, Andersson A. Hopes and fears in implementation of  
631 electronic health records in Bangladesh. *The Electronic Journal of Information Systems*  
632 *in Developing Countries*. 2012 Oct;54(1):1-8.
- 633 38. Gagnon MP, Desmartis M, Labrecque M, Car J, Pagliari C, Pluye P, Frémont P, Gagnon  
634 J, Tremblay N, Légaré F. Systematic review of factors influencing the adoption of  
635 information and communication technologies by healthcare professionals. *Journal of*  
636 *medical systems*. 2012 Feb;36(1):241-77.
- 637 39. Murray E, Burns J, May C, Finch T, O'Donnell C, Wallace P, Mair F. Why is it difficult  
638 to implement e-health initiatives? A qualitative study. *Implementation Science*. 2011  
639 Dec;6(1):1-1.
- 640 40. Shuvo TA, Islam R, Hossain S, Evans JL, Khatun F, Ahmed T, Gazi R, Adams AM.  
641 eHealth innovations in LMICs of Africa and Asia: a literature review exploring factors  
642 affecting implementation, scale-up, and sustainability. *health care*. 2015;8(9).
- 643 41. Busagala LS, Kawono GC. Perceptions and Adoption of Information and Communication  
644 Technology for Healthcare Services in Tanzania. *International Journal of Computing &*  
645 *ICT Research*. 2013 Jun 1;7(1).
- 646 42. Anwar F, Shamim A, Khan S. Barriers in adoption of health information technology in  
647 developing societies. *Int J Adv Comput Sci Appl*. 2011 Aug;2(8):40-5.
- 648 43. Dery S, Vroom FD, Godi A, Afagbedzi S, Dwomoh D. Knowledge and use of  
649 information and communication technology by health sciences students of the University  
650 of Ghana. *Ghana Medical Journal*. 2016 Oct 12;50(3):180-8.



- 651 44. Akhlaq A, McKinstry B, Muhammad KB, Sheikh A. Barriers and facilitators to health  
652 information exchange in low-and middle-income country settings: a systematic review.  
653 Health policy and planning. 2016 Nov 1;31(9):1310-25.
- 654 45. Yagos WO, Tabo Olok G, Ovuga E. Use of information and communication technology  
655 and retention of health workers in rural post-war conflict Northern Uganda: findings from  
656 a qualitative study. BMC medical informatics and decision making. 2017 Dec;17(1):1-8.
- 657 46. Krause DD. State health mapper: an interactive, web-based tool for physician workforce  
658 planning, recruitment, and health services research. Southern Med J. 2015 Nov  
659 1;108(11):650-6.
- 660 47. Bhattacharyya, D.S., Shafique, S., Akhter, S., Rahman, A., Islam, M.Z., Rahman, N. and  
661 Anwar, I., 2020. Challenges and facilitators of implementation of an information  
662 communication and technology (ICT)-based human resources management tool in the  
663 government health sector in Bangladesh: protocol for an exploratory qualitative research  
664 study. *BMJ open*, 10(12), p.e043939.

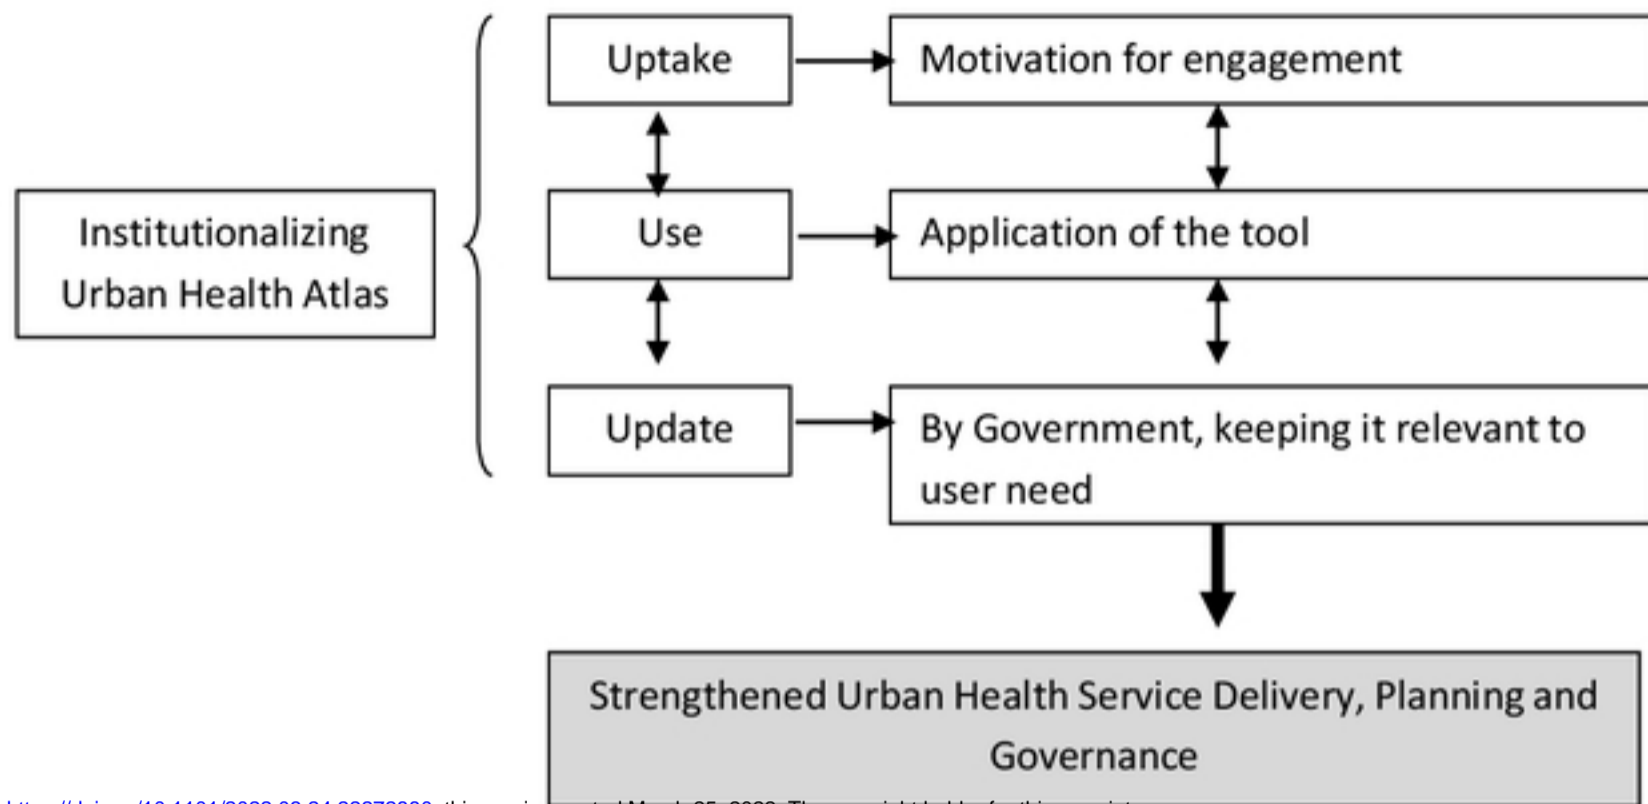

medRxiv preprint doi: <https://doi.org/10.1101/2022.03.24.22272880>; this version posted March 25, 2022. The copyright holder for this preprint (which was not certified by peer review) is the author/funder, who has granted medRxiv a license to display the preprint in perpetuity. It is made available under a [CC-BY 4.0 International license](https://creativecommons.org/licenses/by/4.0/).

**Fig 1. Original conceptual framework for institutionalization developed by authors before implementation**

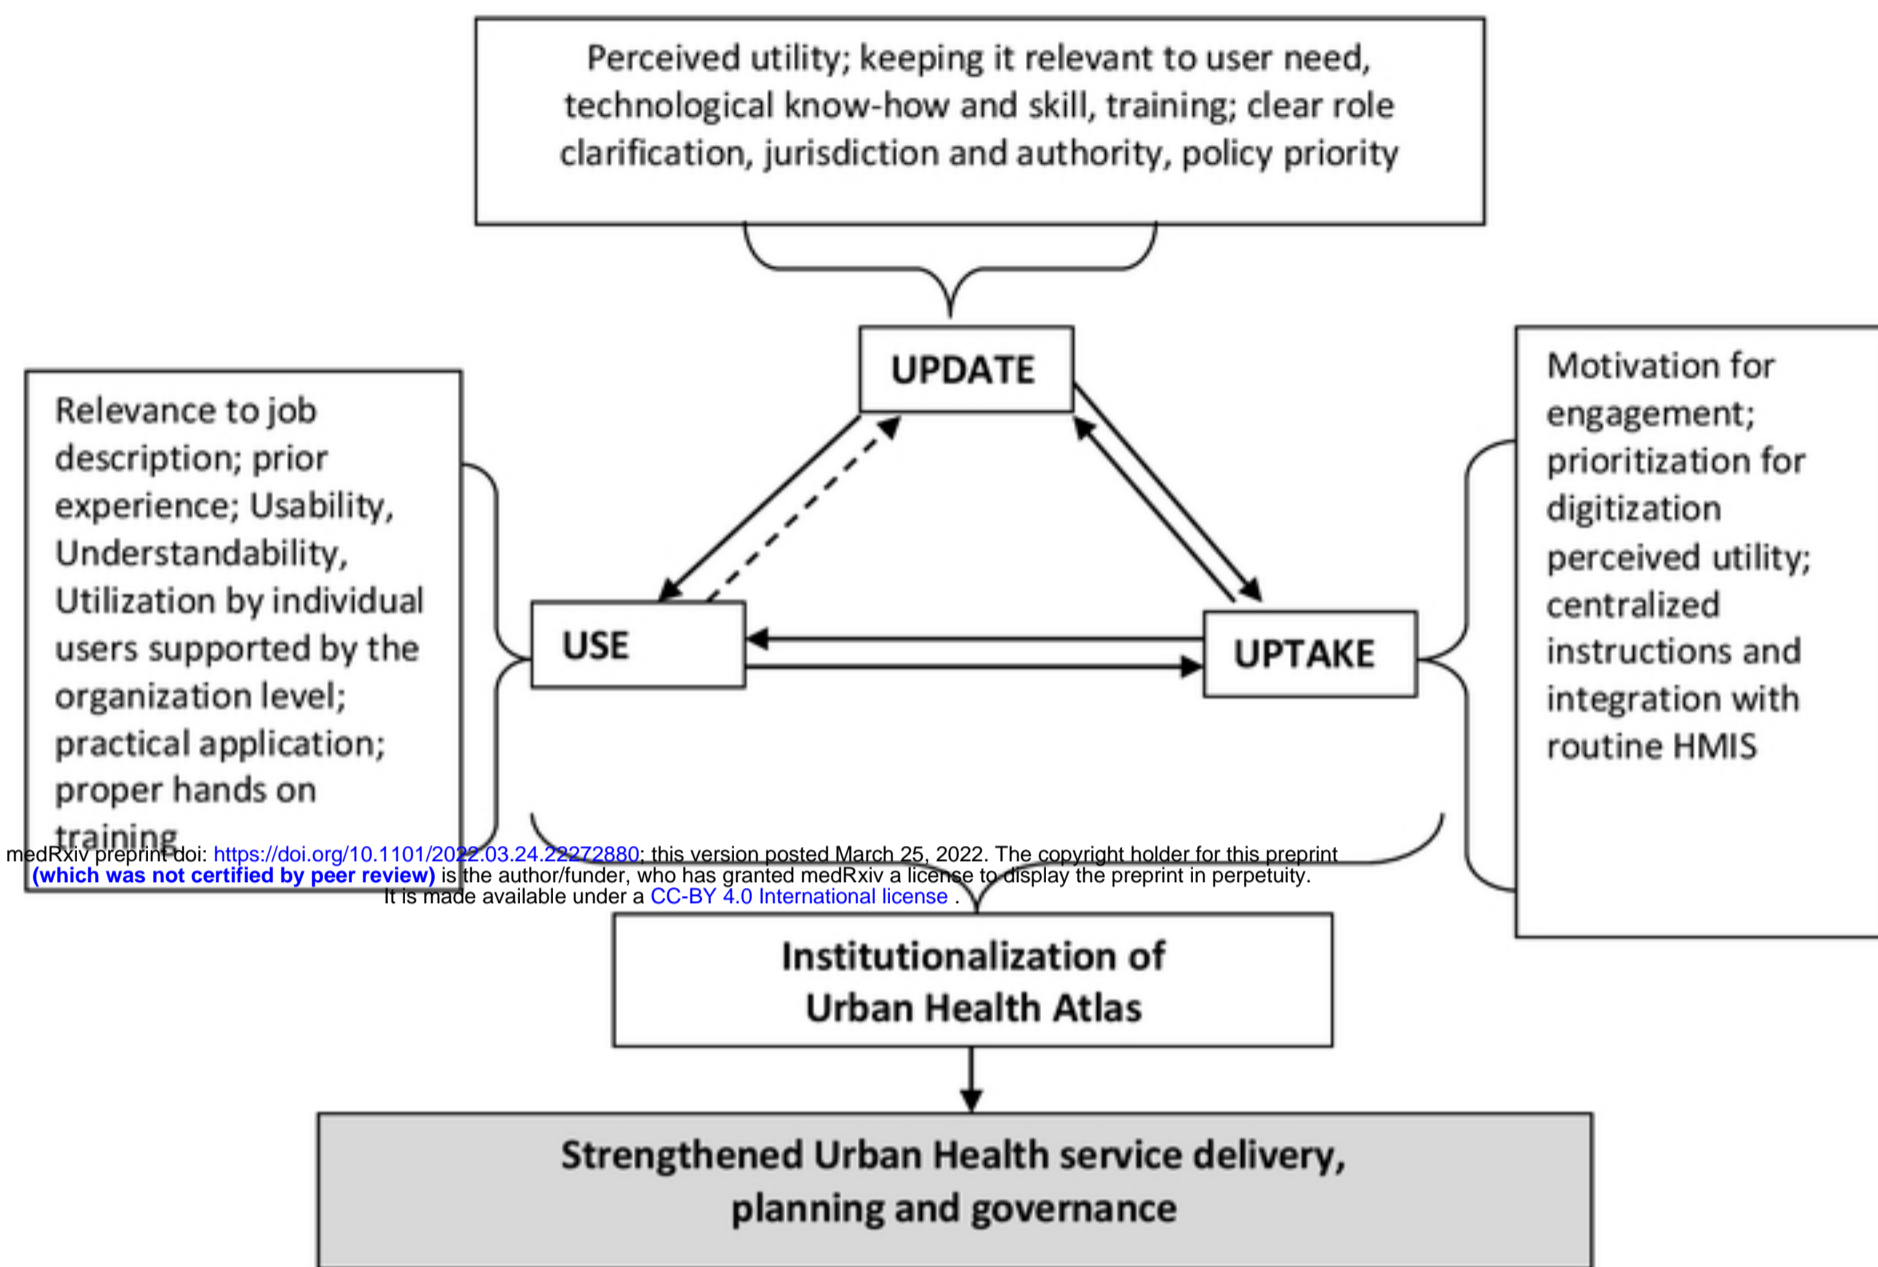

**Fig 2. Revised conceptual framework for institutionalization of Urban Health Atlas**
